# Population structure of *Apodemus flavicollis* and comparison to *Apodemus sylvaticus* in northern Poland based on whole-genome genotyping with RAD-seq

Maria Luisa Martin Cerezo<sup>1,2</sup>, Marek Kucka<sup>3</sup>, Karol Zub<sup>4</sup>, Yingguang Frank Chan<sup>3</sup> and Jarosław Bryk<sup>1\*</sup>

\*Correspondence:

[j.bryk@hud.ac.uk](mailto:j.bryk@hud.ac.uk)

<sup>1</sup>School of Applied Sciences,  
University of Huddersfield,  
Quennsgate, Huddersfield, UK  
Full list of author information is  
available at the end of the article  
†

## Abstract

**Background:** Mice of the genus *Apodemus* are one the most common mammals in the Palaearctic region. Despite their broad range and long history of ecological observations, there are no whole-genome data available for *Apodemus*, hindering our ability to further exploit the genus in evolutionary and ecological genomics context.

**Results:** Here we present results from the whole-genome, high-density genotyping using double-digest restriction site-associated DNA sequencing (ddRAD-seq) on 72 individuals of *A. flavicollis* and 10 *A. sylvaticus* from four populations, sampled across 500 km distance in northern Poland. Our data present clear genetic divergence of the two species, with average sequence divergence, based on 21377 common loci, of 1.51% and an evolutionary rate of 0.0019 substitutions per site per million years. We provide a catalogue of 117 highly divergent loci that enable genetic differentiation of the two species in Poland and to a large degree of 20 unrelated samples from several European countries and Tunisia. We also show evidence of admixture between the three *A. flavicollis* populations but demonstrate that they have negligible average genome-wide population structure, with largest pairwise  $F_{ST} < 0.086$ .

**Conclusion:** Our study demonstrates the feasibility of genome-wide, high-density genotyping in *Apodemus* and provides the first insights into the population genomics of one of the species.

**Keywords:** RAD-seq; genotyping; population structure; rodents; *Apodemus flavicollis*; *Apodemus sylvaticus*

1

2

## 3 Background

4 Mice of the genus *Apodemus* (Kaup, 1829) (*Rodentia: Muridae*) are one the most  
5 common mammals in the Palaearctic region [43]. The genus comprises of three  
6 subgenera (*Sylvaemus*, *Apodemus* and *Karstomys*) [43], however the systematic  
7 classification of the 20 species belonging to the genus [16] is not fully settled [36].  
8 In the Western Palearctic, the yellow-necked mice *A. flavicollis* (Melchior, 1934)  
9 and the woodmice *A. sylvaticus* (Linnaeus, 1758) are widespread, sympatric and  
10 occasionally syntopic species. They are often difficult to distinguish morphologically  
11 in their southern range [30], but in the Central and Northern Europe both are  
12 easily recognisable by the yellow collar around the neck of *A. flavicollis*, absent in  
13 *A. sylvaticus*.

14 Their prevalence in Western Palearctic and common status in Western and Central  
15 Europe made them one of the model organisms to study post-glacial movement of

16 mammals [24, 45]. Both species have traditionally been studied in a parasitological  
17 context, as one of the vectors of *Borellia*-carrying ticks *Ixodes ricinus*, who often feed  
18 on *Apodemus* [13, 61], tick-borne encephalitis virus [47] and hantaviruses [33, 50]  
19 and have been used as markers for environmental quality [40, 66]. Lastly, they  
20 have extra-autosomal chromosomes, called B chromosomes, with varied distribution  
21 among the populations [59] but unknown role, although it has been suggested they  
22 are involved in cellular metabolism [34, 39].

23 Previous studies on *Apodemus* typically employed a small number of microsatellite  
24 [62] and mtDNA markers [24, 42, 44, 45], which are insufficient to learn about the  
25 species' population structure and admixture patterns in detail, or to identify loci  
26 under selection. In the absence of high-quality reference genome, which remains  
27 cost-prohibitive for complex genomes, whole-genome marker discovery enabled by  
28 restriction site-associated DNA sequencing presents a cost-effective method to study  
29 species on a population scale even with no previous genetic and genomic resources  
30 available [4].

31 Here we employ the whole-genome high-density genotyping, using double-digest  
32 restriction site-associated DNA sequencing (ddRAD-seq) to elucidate the genetic  
33 structure and connectivity of three populations of *A. flavicollis* and compare it to a  
34 population of *A. sylvaticus* in Poland. We demonstrate clear divergence between  
35 the two species and very low differentiation within populations of *A. flavicollis*. Our  
36 results provide the first whole-genome-based estimates of population parameters  
37 in *A. flavicollis*, genome-wide calculation of divergence between the two *Apodemus*  
38 species, as well as a selection of loci enabling their accurate identification.

## 39 Results

### 40 Sequencing and variant calling

41 The sequencing produced a total of 92741120 reads. The number of reads per  
42 individual varied from 346810 to 4157586, with an average of 1078385 reads per  
43 individual and median of 905786,5 (Supplementary Table S2). The best parameters  
44 for calling the stacks and variants for the entire dataset were: minimum number  
45 of identical, raw reads required to create a stack  $m = 2$ , number of mismatches  
46 allowed between loci for each individual  $M = 4$  and number of mismatches allowed  
47 between loci when building the catalogue  $n = 5$  (Supplementary Figure S1). The best  
48 parameters calculated for *A. flavicollis* samples only were:  $m = 2$ ,  $M = 4$  and  $n = 3$   
49 (Supplementary Figure S3). The coverage per sample ranged from 4.95x to 26.20x  
50 with an average of 10.13x and median of 9.32x for the entire dataset (Supplementary  
51 Figures S2 and S4).

### 52 SNPs and loci co-identification rates

53 Analysis of the duplicated samples showed that loci and allele misassignment rates  
54 were of similar magnitude, on average, between all pairs of duplicates. The duplicate  
55 pair F06-B02 showed the highest discrepancy between loci, of 10 %, and also between  
56 alleles, of 8 %. When only shared loci were included in the comparisons, all four sets  
57 of duplicates showed on average  $0.5\% \pm 0.2\%$  SNPs called differently (Table 1).

|                          | F06-B02    | A12-F12     | H11-G06    | G02-D01   | MEAN  | SD    |
|--------------------------|------------|-------------|------------|-----------|-------|-------|
| <b>Reads (D1/D2)</b>     | 0.19       | 3.54        | 1.29       | 1.380     |       |       |
| <b>Coverage</b>          | 8.93/11.20 | 15.95/10.22 | 8.05/10.51 | 7.62/8.54 |       |       |
| <b>Locus error rate</b>  | 0.10       | 0.08        | 0.04       | 0.04      | 0.07  | 0.031 |
| <b>Allele error rate</b> | 0.08       | 0.06        | 0.07       | 0.05      | 0.07  | 0.01  |
| <b>SNP error rate 1</b>  | 0.15       | 0.12        | 0.05       | 0.07      | 0.10  | 0.04  |
| <b>SNP error rate 2</b>  | 0.006      | 0.004       | 0.007      | 0.004     | 0.005 | 0.002 |

Table 1: Error rates calculated by comparing four sets of duplicated samples. For explanation of different errors please see Methods. D1/D2: ratio of reads from Duplicate 1 to Duplicate 2.

58 Comparison of *A. flavicollis* and *A. sylvaticus*

59 The number of assembled loci per individual ranged from 46286 to 117366 (mean:  
60 73711, median: 71395, standard deviation: 29917). 52494 loci passed the population  
61 filters established for species differentiation, representing 8,3% of the total 632063  
62 loci included in the catalogue. Out of 158144 SNPs called, 60366 (38.1%) were  
63 removed after filtering for MAF and 52298 (33%) were removed after failing the  
64 HWE test at  $p < 0.05$ ; further 35302 (22.3%) were removed due to a minimum mean  
65 depth lower than 20, leaving 10178 SNPs (6.6%) to be used in the downstream  
66 analyses (Figure 1). PCA plot of the first two components (Figure 2), accounting  
67 for 13.13% of the total variance, shows differentiation of the two species but also  
68 distinguish different populations of *A. flavicollis*.

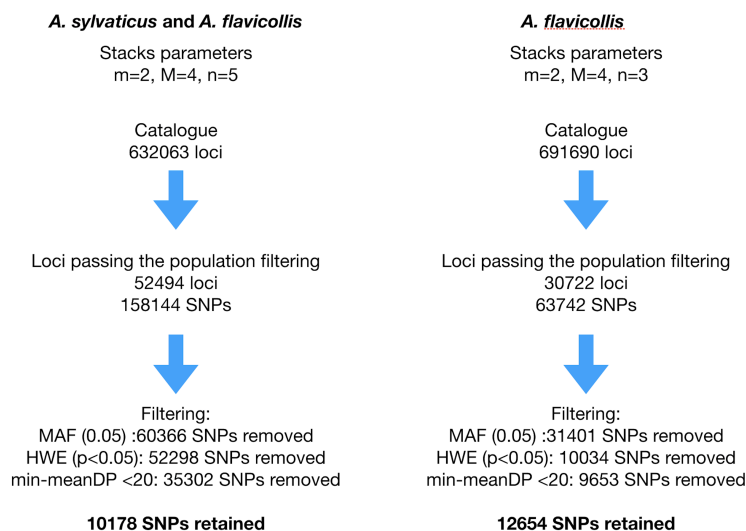

Figure 1: Summary of catalogue construction and SNP filtering steps for the complete dataset (left) and *Apodemus flavicollis* dataset. The graphic includes: Stacks parameters values (m, M, n), number of loci in the catalogue, number of SNPs filtered by minor allele frequency (MAF), which failed the Hardy-Weinberg equilibrium test at  $p < 0.05$  (HWE), SNPs removed due to an average depth, across individuals, lower than 20 (min-meanDP) and the total number of SNPs retained for further analysis

69 Similarly, the phylogenetic tree shows *A. sylvaticus* as a separate clade to the  
70 three populations of *A. flavicollis*, with *A. flavicollis* from geographically closer

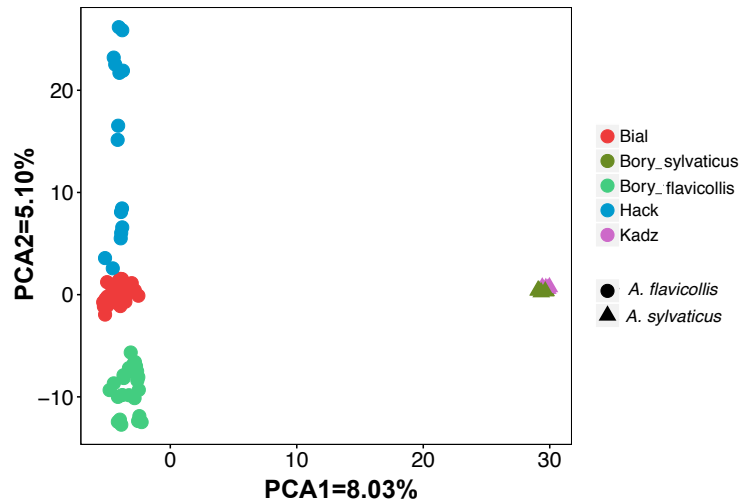

Figure 2: Principal Component Analysis of all samples analysed in the study. Each point represents one sample; the shape of the point represents the species (circles: *Apodemus flavicollis* (n = 72), triangles: *Apodemus sylvaticus* (n = 10), whereas the colour represents the location where the samples were collected: Bial - Białowieża, Kadz - Kadzidło, Hack - Haćki, Bory - Bory Tucholskie.

71 regions (Białowieża and Haćki, 50 km) grouped closer than a population from Bory  
72 Tucholskie, 450 km away from Białowieża (Figure 3). The *A. sylvaticus* and *A.*  
73 *flavicollis* clusters have high bootstrap value support (100% and 99% respectively).

74 We then investigated the suitability of the loci we identified on Polish populations  
75 to distinguish *A. sylvaticus* and *A. flavicollis* from other European populations. The  
76 genotyping of the extra 10 samples from each species (see Methods) produced 179763  
77 SNPs. 62158 (34.58%) were removed after filtering for MAF and 69125 (38.45%)  
78 were removed after failing the HWE test at  $p < 0.05$ ; further 42054 (23.39%) were  
79 removed due to a minimum mean depth lower than 20 and 5203 (2.89%) were  
80 removed due to more than 5% missing data, leaving 1223 SNPs (0.68%) to be used  
81 in the downstream analyses.

82 The first axis of the PCA plot (Figure 4) constructed from this data accounts for  
83 the 65.73 % of the total variance and shows clear differentiation between the two  
84 species. All the *A. flavicollis* samples cluster with the Polish *A. flavicollis* samples,  
85 while all but Tunisian samples of *A. sylvaticus* cluster with the Polish samples of  
86 the same species. Tunisian *A. sylvaticus* appear as a separate cluster but still closer  
87 to the *A. sylvaticus* group. The catalogue of loci used for species identification is  
88 included in the Supplementary Materials, Section 6.

### 89 Genetic diversity and population structure of *A. flavicollis*

90 The number of assembled loci per individual in the Polish populations ranged from  
91 46286 to 117366 (mean: 72738, median: 70592, stdev: 12575). 30722 loci passed the

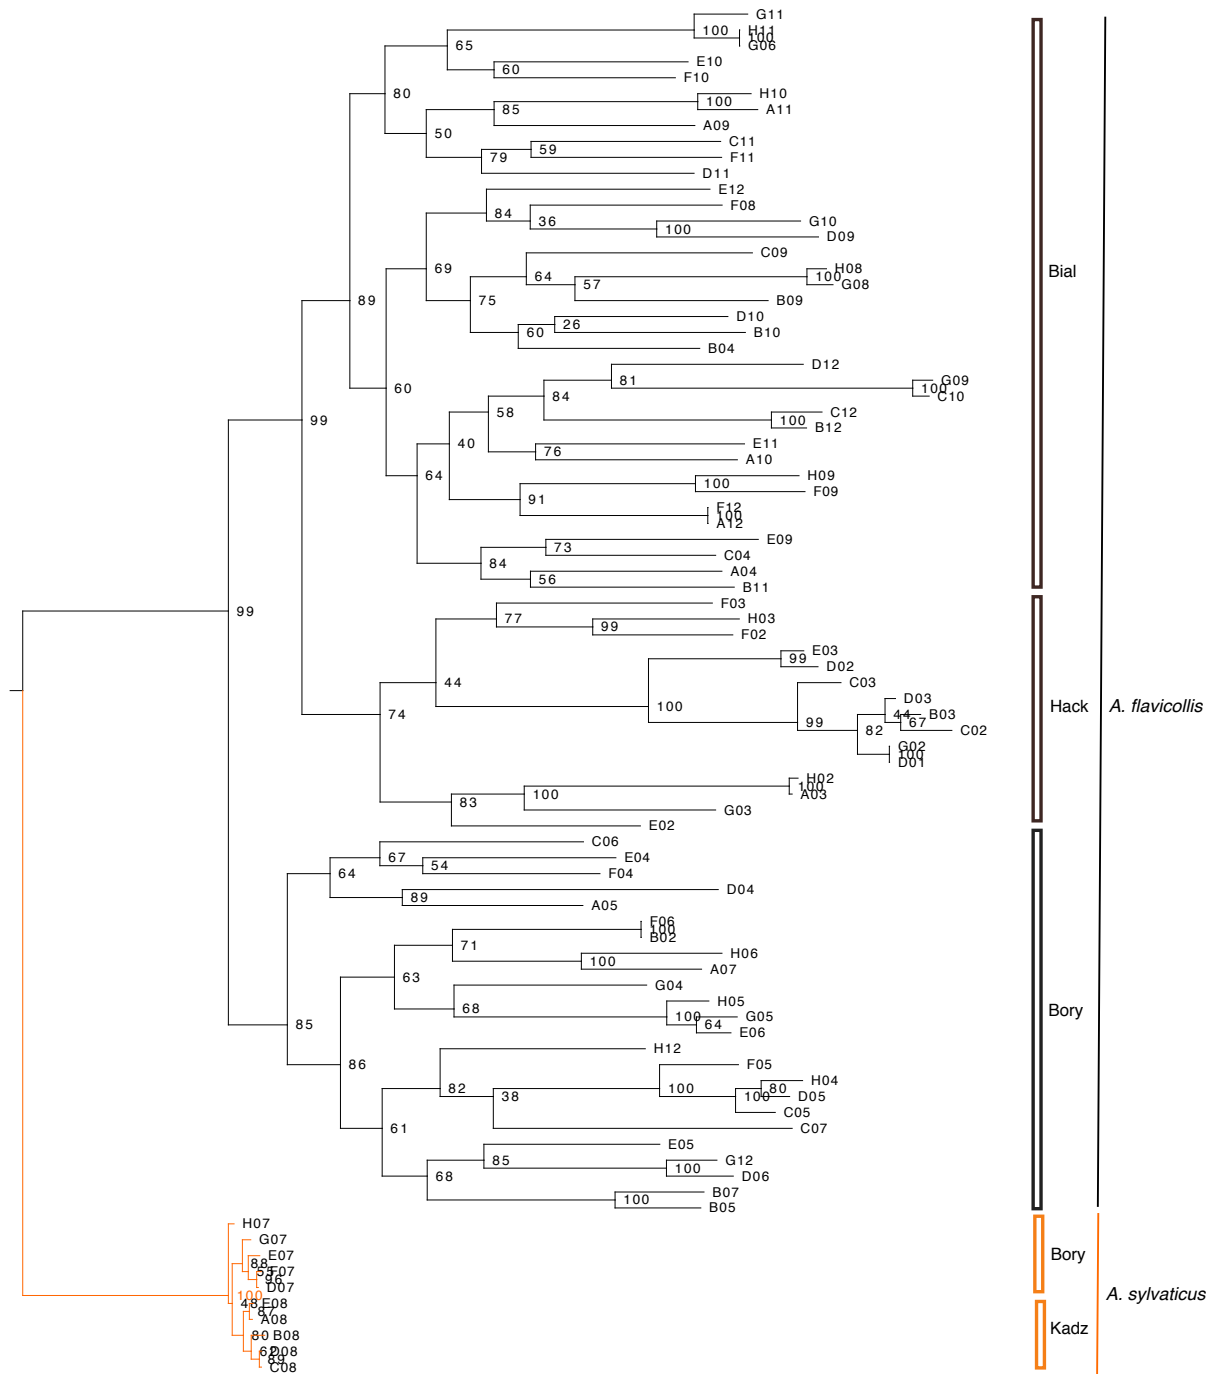

Figure 3: Maximum likelihood phylogenetic tree of all the samples analysed in the study. Colour represents the species: *A. sylvaticus* (n=10) in orange and *A. flavicollis* (n=72) in black. Duplicates samples are included: F06-B02 from Bory Tucholskie, F12-A12 and H11-G06 from Białowieża and G02-D01 from Hacki. Bootstrap support values from 100 replicates are indicated at the nodes of the tree. Bial - Białowieża, Kadz - Kadzidło, Hack - Haćki, Bory - Bory Tucholskie.

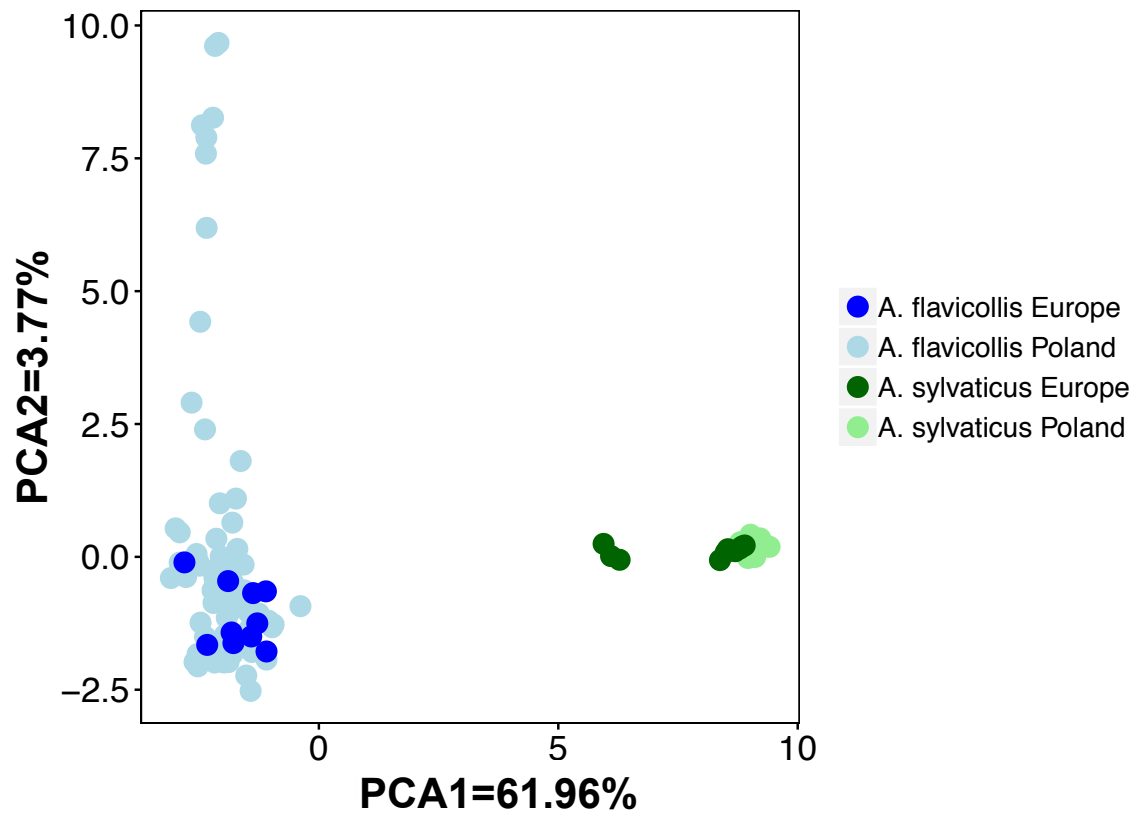

Figure 4: Species identification through Principal Component Analysis using a catalogue of 632060 loci and 1223 final SNPs. Light colours represent samples from Poland while dark colours represent samples from other European regions and Tunisia (collectively named "Europe"). Green: *A. sylvaticus*, blue: *A. flavicollis*.

92 population filters established for population differentiation, representing and 4,43%  
93 of the total 691960 loci included in the catalog. Out of 63742 SNPs called, 31401  
94 (49.26%) were removed after filtering for MAF and 10034 (15.74%) were removed  
95 after failing the HWE test at  $p < 0.05$ . Further 9653 (15.14%) were removed due to a  
96 minimum mean depth lower than 20, leaving 12654 (19.85%) SNPs to be used in  
97 the downstream analyses (Figure 1).

98 PCA plot (Figure 5) shows differentiation between the three Polish *A. flavicollis*  
99 populations, with PC1 and PC2 cumulatively explaining 10.47% of the total variance.  
100 Haćki population shows larger diversity than the other populations, with some  
101 Haćki individuals closer to Białowieża individuals than to others from this location.  
102 Phylogenetic tree (Figure 6) supports this pattern of differentiation. Bory Tucholskie  
103 and Haćki populations each form a cluster with a 100% of bootstrap support  
104 value, whereas Białowieża forms a third cluster with an 95% of bootstrap support.  
105 Białowieża and Bory Tucholskie population together form a large cluster with a  
106 100% bootstrap support.

107 In the ADMIXTURE analysis, the lowest cross-validation errors [1] were always  
108 found for  $K = 3$ , indicating contribution of three ancestral populations (Figure 7).

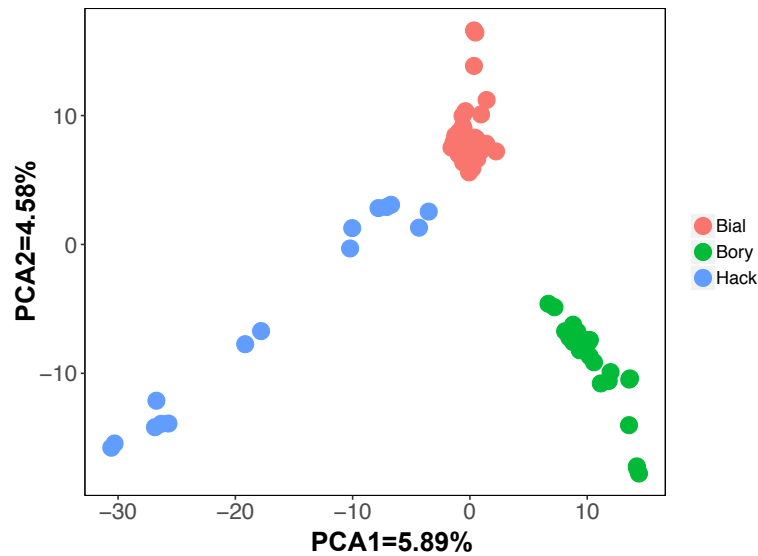

Figure 5: PCA plot showing Polish samples of *A. flavicollis* from Białowieża (red) (n=35), Hački (blue) (n=14) and Bory Tucholskie (green) (n=23). Bial - Białowieża, Kadz - Kadzidło, Hack - Hački.

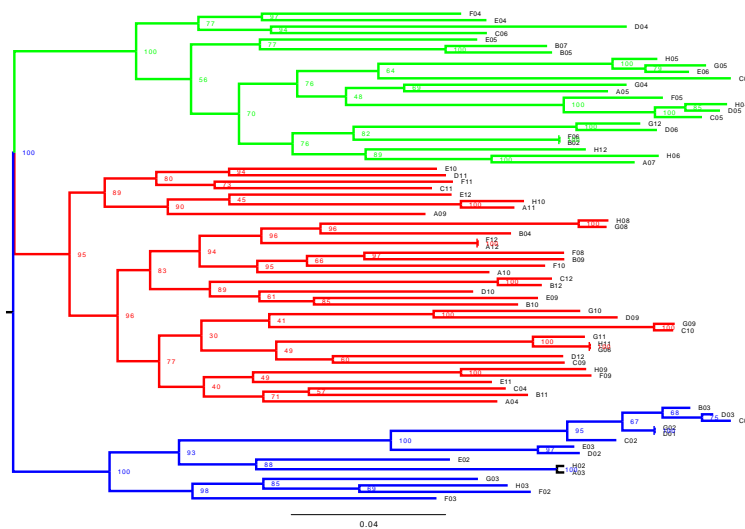

Figure 6: Maximum likelihood phylogenetic tree of n = 72 *A. flavicollis* samples from Białowieża (red, n = 35), Hački (blue, n = 14) and Bory Tucholskie (green, n = 23). Bootstrap support values from 100 replicates are indicated at the nodes of the tree.

109 Majority of samples from each of the populations show a single dominant component  
110 of ancestry with little contribution from other populations, with the exception of four  
111 individuals from Hački, which show clear admixture of the Białowieża population.

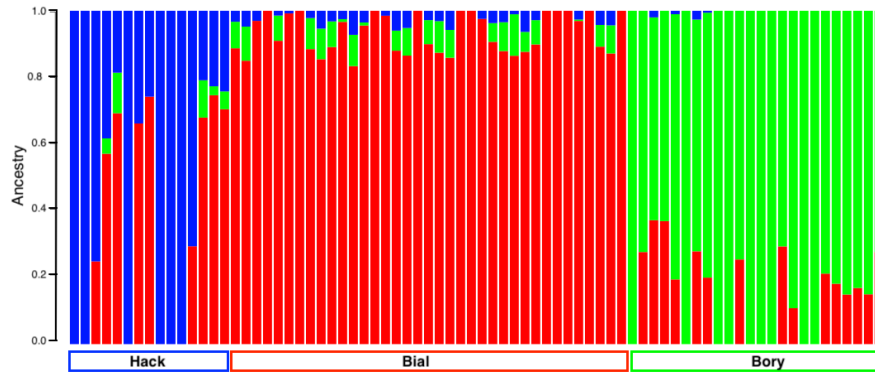

Figure 7: Maximum likelihood Admixture analysis of all *A. flavicollis* samples for the optimal  $K = 3$ . Each bar represents an individual and each colour represents its ancestry component (red: Białowieża, blue: Haćki, green: Bory Tucholskie).

112 Recognising that STRUCTURE-type analyses (on which ADMIXTURE is based)  
113 may be sensitive to the effects of uneven number of samples in compared groups [57],  
114 we repeated the ADMIXTURE analysis 10 times, each time randomly drawing the  
115 same number of individuals ( $n = 15$ ) from each population. In all cases, the lowest  
116 cross-validation errors were found for  $K = 2$ , followed by  $K = 3$  (Supplementary  
117 Figure S5). At even sampling, ADMIXTURE pattern found for  $K = 3$  was the  
118 closest to the observed ecological and geographical distribution of the samples and  
119 closely matched our results when all samples were included (Supplementary Figure  
120 S6).

121 The patterns of heterozygosity highlight Haćki as the only population where the  
122 values of  $H_o$  is higher than  $H_e$ , where the  $F_{IS}$  is negative (Table 2). As parameters  
123 such as number of private alleles, nucleotide diversity and heterozygosity can vary  
124 with sample size, we performed 100 calculations of the above parameters using  
125 random sampling of the same number of individuals ( $n = 15$ ) from each population.  
126 The parameters showed similar relationships except for the number of private alleles  
127 (data not shown).

128  $F_{st}$  values are consistently very low between all the populations, even though  
129 populations from Haćki and Bory Tucholskie show three-fold higher  $F_{st}$  values that  
130 for the other two pairs of populations (Table 3).

### 131 Species divergence

132 Finally, we calculated that the average divergence between *A. flavicollis* and *A.*  
133 *sylvaticus*, based on 21377 shared loci, is 1.51 % (min=0%, max= 6.38%, median=  
134 1.42%, stdev= 1.11%).



| Pop ID          | N  | Npa | Ind per loci | Obs Het | Exp Het | Pi   | Fis   |
|-----------------|----|-----|--------------|---------|---------|------|-------|
| Haćki           | 15 | 32  | 14.42        | 0.30    | 0.27    | 0.28 | -0.04 |
| Bory Tucholskie | 24 | 74  | 22.93        | 0.28    | 0.28    | 0.29 | 0.02  |
| Białowieża      | 37 | 148 | 35.13        | 0.29    | 0.30    | 0.30 | 0.01  |

Table 2: Population genetic parameters calculated based on 12654 SNPs from all 72 individuals of *A. flavicollis*. N, number of individuals; Npa, number of private alleles; Ind per loci, Mean number of individuals per locus in this population;  $H_o$  observed and  $H_e$  expected heterozygosity;  $\pi$ , average nucleotide diversity;  $F_{IS}$  inbreeding coefficient

|                 | Bory Tucholskie | Białowieża |
|-----------------|-----------------|------------|
| Haćki           | 0.085           | 0.055      |
| Bory Tucholskie |                 | 0.045      |

Table 3: Pairwise  $F_{ST}$  values for the three populations of *A. flavicollis*.

135 We then identified the top 117 most divergent loci between the species, which all  
136 had the divergence larger than 4.9% (The loci ID are provided in the Supplementary  
137 Table S3), and checked whether these loci alone allow for accurate assignment of  
138 samples to the two species. We constructed PCA plots from the Polish samples  
139 only and from the Polish, other European and Tunisian samples together. They  
140 demonstrate that while the 117 loci are sufficient to clearly assign Polish samples  
141 to the two species (Supplementary Figure S7), some uncertainty remains when we  
142 use these loci for the broader set of samples. Whereas all *A. flavicollis* samples do  
143 cluster together, *A. sylvaticus* samples do not form a clearly differentiated group  
144 (Supplementary Figure S7).

## 145 Discussion

146 RAD-sequencing approaches, including double-digest RAD-seq and its variants [5, 20,  
147 46, 53, 54], have allowed a cost-effective discovery of thousands of genetic markers in  
148 both model and non-model organisms [22, 63], proving to be a transformative research  
149 tool in population genetics ([7, 12, 26]), phylogeography and phylogenetics [3, 25, 29,  
150 60], marker development [52], linkage mapping studies [6], species differentiation [49]  
151 and detecting selection [65]. However, despite the widespread use of this approach  
152 to genome-wide marker discovery, only few studies have used RAD-seq in mammals  
153 [18, 32, 35, 48, 64]. Here, we have identified over 10000 markers in two closely  
154 related and common species of *Apodemus* in Western Palearctic, characterised the  
155 population structure of *A. flavicollis* and compared it to *A. sylvaticus*, for the first  
156 time providing genome-wide estimates of the species divergence and population  
157 genetic parameters.

## 158 Technical considerations

159 We have used four pairs of technical duplicates to check the accuracy of the RAD-seq  
160 genotyping based on the Poland protocol [55]. The largest source of discrepancy in  
161 SNP calls between the duplicates is caused by unequal identification of loci: the  
162 difference in our case averaged approximately 10% (Table 1) and was similar to  
163 allele misidentification rates. However, when considering only shared loci between  
164 the duplicates, the discrepancy in SNP calls fell by over an order of magnitude to  
165 an average of 0.5%, indicating high accuracy and reliability of calls in once-defined

166 shared loci. Our finding of loci calls being the major source of genotyping variability  
167 agrees with Mastretta *et al.* (2015), although our discrepancies are almost an order  
168 of magnitude smaller. Moreover, despite the differences in number of loci included  
169 in the analysis, each duplicated pair of samples clustered together with a 100%  
170 bootstrap values support and branch length equal to 0 on the phylogenetic tree  
171 (Figure 6), indicating that the samples were identical. Overall, our finding reiterates  
172 the importance of the influence of stochastic events and imprecise size selection  
173 in the library preparations on genotyping calls [41]. We note that some of these  
174 variables could be better controlled with automated size-selection approaches [53].  
175 Our findings also illustrate the usefulness of including technical replicates during  
176 library preparation.

### 177 Effect of group size

178 Permutations performed for the calculations of genetic diversity parameters (Table  
179 4) have shown that with the exception of the number of private alleles, the results  
180 are comparable, regardless of the number of samples included per each population.

| Pop ID          | N  | Npa    | Ind per loci | Obs Het | Exp Het | Pi   | Fis   |
|-----------------|----|--------|--------------|---------|---------|------|-------|
| Hańky           | 15 | 115.53 | 14.42        | 0.31    | 0.28    | 0.29 | -0.05 |
| Bory Tucholskie | 15 | 183.95 | 14.33        | 0.29    | 0.28    | 0.29 | 0.02  |
| Białowieża      | 15 | 204.84 | 14.23        | 0.30    | 0.29    | 0.31 | 0.02  |

Table 4: Average genetic diversity parameters for *Apodemus flavicollis* calculated from 100 permutations of 45 individuals (15 samples per population, 12654 SNPs). N, number of individuals; Npa, number of private alleles; Ind per loci, Mean number of individuals per locus in this population;  $H_o$  observed and  $H_e$  expected heterozygosity;  $\pi$ , average nucleotide diversity;  $F_{IS}$  inbreeding coefficient

181 In the ADMIXTURE, we observed different optimal K depending on whether all  
182 samples were included in the analysis ( $K = 3$ ) or a set of 15 randomly-chosen set of  
183 samples from each population ( $K = 2$ , although closely followed by  $K = 3$ ). While  
184 the previously reported tendency of STRUCTURE-like analyses to produce  $\Delta K$   
185  $= 2$  does not apply in our case due to different method to select optimal number  
186 of clusters [28], we chose to use  $K = 3$  for our analyses due to close match to the  
187 spatial and ecological locations from which our populations were sampled. The  
188 results obtained for  $K = 3$  in the evenly-sampled dataset were similar to the clusters  
189 obtained for  $K = 3$  with the complete dataset.

### 190 Population structure

191 The  $F_{ST}$  values calculated in this study between all three pairs of populations  
192 of *A. flavicollis*, based on 12654 SNPs, are consistently low and are not affected  
193 when we randomly draw the same number of individuals from each population to  
194 compute pairwise  $F_{ST}$  (Table 5). Previous studies of *A. flavicollis* populations in  
195 north-eastern Poland based on a small number of microsatellites showed similarly  
196 and consistently low values [14, 21], even though Gortat *et al.* [21] suggested some  
197 population structure based on statistically significant differences between very low  
198 pairwise  $F_{ST}$  values. Czarnomska *et al.* [14] also suggest large, broadly geographically  
199 defined clusters of *A. flavicollis* in north-eastern Poland that are separated by highly

|                        | <b>Bory Tucholskie</b> | <b>Białowieża</b> |
|------------------------|------------------------|-------------------|
| <b>Haćki</b>           | 0.045 ± 0.002          | 0.057 ± 0.001     |
| <b>Bory Tucholskie</b> |                        | 0.045 ± 0.002     |

Table 5: Average pairwise  $F_{ST}$  values  $\pm$  standard deviation for the three populations of *A. flavicollis* calculated from 100 permutations of 45 individuals (15 samples per population, 12654 SNPs)

200 admixed individuals, but, again,  $F_{ST}$  between those clusters are as low as those  
201 reported by Gortat et al. [21] and this study.

202 We would argue, based on a much larger set of genome-wide markers reported  
203 here, that *A. flavicollis* has a negligible population structure across the entire area  
204 studied. Large number of markers nevertheless allows us to discover evidence for  
205 admixture of Białowieża population and Haćki (Figure 7), further indicated by  
206 relatively high heterozygosity and negative  $F_{IS}$  in this population. It is therefore  
207 intriguing that such a low differentiation occurs across hundreds of kilometres of  
208 varying landscape in a species that typically has a limited range of about 4 km<sup>2</sup>  
209 and that suffers up to 86% winter mortality rate [56], which would lead to multiple  
210 bottlenecks and drift-driven population differentiation. With this in mind, our data  
211 suggests a much larger dispersal ability of the species, a much better connectivity  
212 between populations, or both.

213 The heterozygosity values reported in this study are smaller than in previous  
214 work by Czarnomska et al. [14], Gortat et al. [21]. They range from 0.28 to 0.31, in  
215 comparison to ranges between 0.84 to 0.88 in [14] and 0.56 and 0.7 in [21] for most  
216 but not all of their markers. However, as their work was based on few microsatellites,  
217 these differences likely reflect the higher variability of microsatellites compared to  
218 SNPs [17, 19, 23].

219 Both low overall  $F_{ST}$  and moderate heterozygosity suggest it would be worthwhile  
220 to conduct a genome-wide scan for selection using  $F_{ST}$  as a metrics of local genomic  
221 differentiation to identify geographically local regions under selection. This, however,  
222 is not yet possible given the lack of high-quality reference genome for *Apodemus* and  
223 unknown synteny to the available genome of *Mus musculus*.

#### 224 Divergence and differentiation of *A. flavicollis* and *A. sylvaticus*

225 Given that accurate identification of the two species using morphological characters  
226 is problematic, especially in their southern range [9], a large collection of markers  
227 identified in this study allowed us to create a catalogue of 632060 loci that allow  
228 clear differentiation between species. This identification is somewhat biased, as the  
229 catalogue was built using many more samples of *A. flavicollis* than *A. sylvaticus*  
230 (72 vs 10) and both from a relatively limited geographical range. Nevertheless, it  
231 allowed for accurate assignment of *A. flavicollis* samples and to a large degree of  
232 *A. sylvaticus*, as we demonstrated on a set of 20 independent samples from other  
233 European countries and Tunisia (Figure 4). Given the wide distribution of both  
234 species in Western Palearctic, a more representative sample from both species from  
235 a broader geographic range would likely provide more accurate set of markers for  
236 their identification.

237 Finally, we calculated the nucleotide divergence between the two species, based on  
238 21377 shared loci, which is 1.51%. Considering a divergence time between *A. flavicollis*

239 and *A. sylvaticus* estimated from archeological data of 4 Mya [42], the evolution  
240 rate is 0.0019 substitutions per site per million of years. This estimate of sequence  
241 divergence level is in broad agreement with calculations based on mitochondrial 12S  
242 rRNA, IRBP and Cytochrome b genes [43]. However, our calculation is likely an  
243 underestimate, as we only used shared loci to calculate divergence and did not include  
244 the potential impact of insertion/deletion events, which can significantly affect the  
245 total genomic divergence between species Britten [8], Li et al. [38]. Highly divergent  
246 sequences would have been identified as different loci, and would not be compared  
247 to their true homologous sequences.

## 248 Conclusions

249 We have successfully applied the ddRAD-seq approach to discover tens of thousands  
250 of SNPs in wide-spread and common mammalian species of *A. flavicollis* and *A.*  
251 *sylvaticus*. The high resolution data obtained here allowed us to delineate geographi-  
252 cally close populations, including identifying admixture between them, but suggest  
253 that *A. flavicollis* effectively forms a single population in an entire sampling area  
254 that spans 500 km in the W-E direction. Comparing *A. flavicollis* and *A. sylvaticus*,  
255 we have calculated their genome-wide divergence and identified a set of genomic  
256 loci that enable effective molecular identification of the species. We anticipate that  
257 with the development of further whole-genome resources, *Apodemus*, thanks to its  
258 common status, broad geographic range and long history of ecological observations,  
259 will become an excellent model species for evolutionary and ecological research in  
260 the genomic era.

## 261 Methods

### 262 Sample collection and DNA extraction

263 Eighty two individuals (10 *Apodemus sylvaticus* and 72 *Apodemus flavicollis*) from  
264 four locations in northern Poland spanning 500 km were trapped in 2015 (Figure 8).  
265 *A. flavicollis* were collected in Białowieża (E23.8345814, N52.7231935), an oak-lime-  
266 hornbeam forest (n = 35), Bory Tucholskie (E17.5160265, N53.7797608), in an oak-  
267 lime-hornbeam and pine forest (n = 23) and Haćki (E23.1793284, N52.834369), in a  
268 xerothermic meadow (n = 14). *A. sylvaticus* were trapped in Kadzidło (E21.3778496,  
269 N53.2089113) in a dry pine forest (n = 5) and in Bory Tucholskie, mainly in a pine  
270 forest (n = 5) (Supplementary Table S1). While *A. flavicollis* are present in all  
271 sampled locations, there have been no trappings of *A. sylvaticus* in Białowieża for  
272 the last 20 years, despite Białowieża being within the European range of this species  
273 (Dr Karol Zub, personal communication). The sampling procedures were approved  
274 by the Local Ethical Commission on Experimentation on Animals in Białystok,  
275 Poland, under permission number 2015/99.

276 Tail clippings were collected, preserved in  $\geq 95\%$  ethanol and stored at  $-20^{\circ}\text{C}$  until  
277 DNA extraction. The tissues were digested by incubating at  $55^{\circ}\text{C}$  overnight with  
278 lysis buffer (10mM Tris, 100mM NaCl, 10mM EDTA, 0.5% SDS) and proteinase  
279 K (20mg/ml). Subsequently, potassium acetate and RNase A were used to remove  
280 protein and RNA contamination. Three ethanol washes were performed using Sera-  
281 Mag SpeedBeads solution (Gelifesciences, Marlborough, MA, USA). The quality  
282 and integrity of the DNA was tested in a 2% agarose gel. Twenty-fold dilutions of

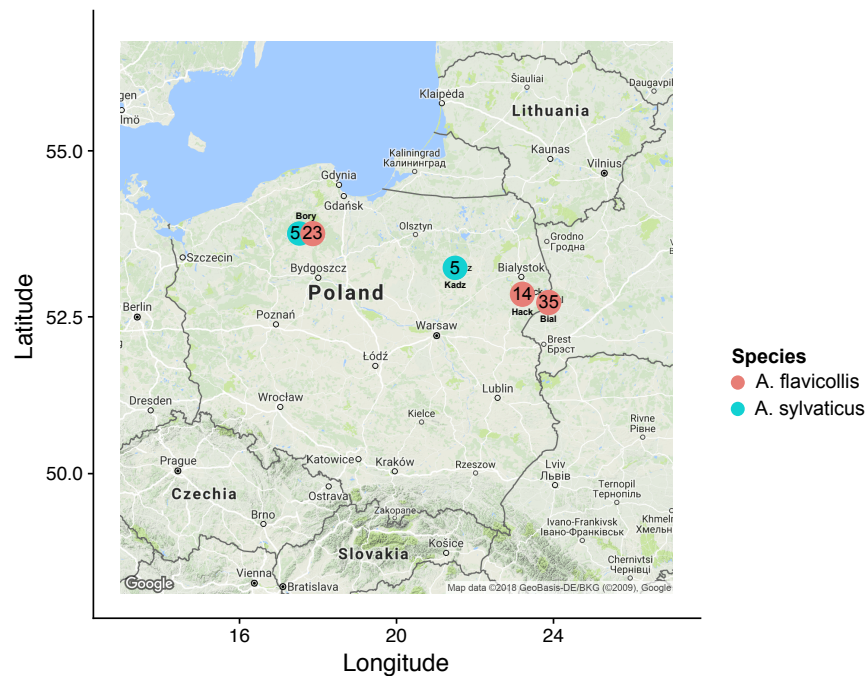

Figure 8: Locations of the Polish samples used in this study. Red circles represent samples from *Apodemus flavicollis* while blue dots represent samples from *Apodemus sylvaticus*. The number inside the circles are the number of samples from each locality. Bial - Białowieża, Kadz - Kadzidło, Hack - Haćki, Bory - Bory Tucholskie.

283 the samples were used to measure the DNA concentration using Quant-iT PicoGreen  
284 dsDNA assay kit (Invitrogen, Carlsbad, CA, USA) and concentration of each sample  
285 was then normalised to 10 ng/ $\mu$ l in 20 $\mu$ l volume. Four samples were used as technical  
286 duplicates (F06-B02, G02-D01, H11-G06, F12-A12). Technical duplicates had the  
287 same DNA but were digested and ligated to barcodes independently.

#### 288 ddRAD-seq library preparation

289 ddRAD-seq library was prepared following the protocol from Poland and Rife [54],  
290 adapted to a different combination of enzymes. Briefly, genomic DNA was digested  
291 in a 20  $\mu$ l reaction with CutSmart<sup>®</sup> buffer, 8 units of *SbfI* and 8 units of HF-*MseI*  
292 (New England Biolabs, Frankfurt am Main, Germany). Digestion was performed at  
293 37°C for 2 hours. Enzymes were inactivated at 65°C for 20 minutes and the reactions  
294 were kept at 8°C. Adapter ligation was performed at 22°C for 2 hours and the ligase  
295 was inactivated by incubating the samples at 65°C for 20 minutes. Samples were  
296 cooled down to 8°C and multiplexed by combining 5 $\mu$ l of each sample. P1 adapters  
297 contained barcodes with a length between 5 and 10 bp.

298 PCR amplification was conducted in 25 $\mu$ l with 1 $\mu$ l of each primer (Illu-  
299 minaF\_PE: AATGATACGGCGACCACCGAGATCTACACTCTTCCCTACAC-  
300 GACGCTCTTCCGATCT and IlluminaR\_PE: CAAGCAGAAGACGGCATAAC-  
301 GAGATCGGTCTCGGCATTCCTGCTGAA) at 10mM, 0.5 $\mu$ l of 10 mM dNTPs,  
302 13.25 $\mu$ l of PCR-grade water, 5 $\mu$ l of 5x Phusion HF Buffer, 0.25 $\mu$ l of Phusion DNA



303 Polymerase (New England Biolabs, Frankfurt am Main, Germany) and 4 $\mu$ l of the  
304 multiplexed DNA. After an initial denaturation step of 30s at 98°C, PCR reaction  
305 was carried out for 12 cycles (10s at 98°C, 20s at 58°C and 15s at 72°C). Final  
306 elongation step was performed at 72°C for 5 minutes.

307 PCR products were loaded into a single lane on a 1% agarose gel with 100 bp DNA  
308 ladder (New England Biolabs, Frankfurt am Main, Germany). Fragments between  
309 200 and 500 bp were cut from the gel with a scalpel and purified using the QIAquick  
310 gel extraction kit (QIAGEN, Hilden, Germany), followed by the second cleanup  
311 step with Sera-Mag SpeedBeads (Gelifesciences, Marlborough, MA, USA). Sizing,  
312 quantification and quality control of the DNA was performed using Bioanalyzer  
313 2100 (Agilent, Santa Clara, CA, USA) before paired-end sequencing on an Illumina  
314 HiSeq 3500 with 150 bp read length.

#### 315 Processing of RAD-tags

316 Sequences were analysed with Stacks version 1.48 [10]. Samples were demultiplexed  
317 using `process_radtags` allowing no mismatches in barcodes and cutting sites. Se-  
318 quences with uncalled bases and low quality scores were removed and all reads were  
319 trimmed to 141 bp. The four files generated per sample by `process_radtags` were  
320 concatenated using a custom bash script. The best parameters for building and  
321 calling SNPs *de novo*, using `denovo_map`, were calculated following Paris *et al.*  
322 [51] approach, using either samples from both species or only from *A. flavicollis*.  
323 Secondary reads were not used to call haplotypes in `denovo_map` (option -H).

#### 324 SNPs and loci co-identification rates

325 We estimated the loci and SNP co-identification rates by analysing a set of four  
326 samples that were prepared and sequenced in duplicates. Sequences for 52494 loci  
327 from both species, were extracted using `-fasta_samples` option from the population  
328 package in Stacks. We extracted sequences for each of the duplicated samples with a  
329 custom script and calculated co-identification rates as described by [41]. Briefly, the  
330 locus misassignment rate is the percentage of unidentified loci, calculated by dividing  
331 the number of loci found only in one of the duplicates by the total number of loci  
332 in each sample. The allele misassignment rate is the percentage of mismatches  
333 between the UIPAC consensus sequences between homologous loci from each pair of  
334 duplicates. Finally, the two SNP error rates: the percentage of different SNPs called  
335 in each of the duplicated samples using either all 10178 SNPs or using the SNPs  
336 called without missing data between duplicate samples excluded (see Table 1).

#### 337 Variant calling and filtering

338 We combined the data from *A. sylvaticus* and *A. flavicollis* to establish species  
339 differentiation and then filtered the SNPs using the population package from Stacks  
340 [10] and VCFtools [15]. We kept SNPs common to the 80% of the individuals in each  
341 species ( $p=1$ ,  $r=0.8$ ) and excluded SNPs with minor allele frequencies  $MAF < 0.05$   
342 and which deviated from the Hardy-Weinberg equilibrium (HWE) at  $P < 0.05$ . We  
343 also removed sites with mean depth values lower than 20. We manually modified  
344 the chromosome numbers in the vcf file to input it into SNPhylo [37], which we  
345 used to build the tree. We set a missing rate (-M) of 1, minor allele frequencies

346 (-m) of 0, linkage disequilibrium threshold (-l) of 1 and the -r option to skip the  
347 step of removing low quality data. Confidence values were estimated using 1000  
348 bootstrap replicates. The root was manually fixed to separate both species. Principal  
349 Component Analysis (PCA) was performed using the R package Adegenet [31]  
350 (Figure 3).

351 The set of divergent loci identified between the two species in Polish samples was  
352 tested for its ability to differentiate an extra set of samples from other locations in  
353 Europe and Tunisia. Ten *A. flavicollis* (2 samples from Austria, 5 from Lithuania  
354 and 3 from Romania) and 10 samples of *A. sylvaticus* (4 samples from Wales, 3 from  
355 Tunisia and 3 from Scotland) were kindly provided by Dr Jeremy Herman, National  
356 Museums Scotland, Dr Johan Michaux, University of Liege and Dr Karol Zub,  
357 Mammal Research Institute of the Polish Academy of Sciences (MRI) (Supplementary  
358 Table S4). We considered all 20 test samples as a different group from Polish *A.*  
359 *sylvaticus* and *A. flavicollis* for SNP calling. We kept SNPs common to the 80% of  
360 the individuals in each group ( $p=1$ ,  $r=0.8$ ) and excluded SNPs with minor allele  
361 frequencies  $MAF < 0.05$ , SNPs which deviated from the Hardy-Weinberg equilibrium  
362 (HWE) at  $P < 0.05$ , sites with mean depth values lower than 20 and with more than  
363 5% of missing data.

#### 364 Population divergence

365 To analyse genetic diversity and population connectivity within *A. flavicollis*, we  
366 analysed the three populations (Bory Tucholskie, Białowieża and Haćki) separately  
367 ( $p=3$ ,  $r=0.8$ ), while keeping the other parameters as described above. Due to the  
368 lack of outgroup, a mid-point root was chosen in the phylogenetic tree. Individual  
369 ancestries were estimated following a maximum likelihood approach with ADMIX-  
370 TURE [2], after conversion of the VCF file to ped with plink version 1.9 [11, 58].  
371 ADMIXTURE analysis was run for each of  $K=1$  to  $K=5$ , each using 10 different  
372 seeds. Weighted (Weir-Cockerham)  $F_{st}$  was calculated with VCFtools v0.1.13. Het-  
373 erozygosity,  $\pi$  and  $F_{is}$  were calculated with the population package from Stacks  
374 [10].

#### 375 Species divergence

376 To calculate the divergence between the two species, a set of common loci was ex-  
377 tracted with a custom script and the strict consensus sequences for each species were  
378 calculated with Consensus.pl script [27]. Sequence divergence was then calculated  
379 using a custom R script (Supplementary Materials, Section 9).

#### 380 Competing interests

381 The authors declare that they have no competing interests.

#### 382 Funding

383 This project was supported by the University of Huddersfield, the Friedrich Meiser laboratory of the Max Planck  
384 Society and Microsoft Azure Research Award CRM:0518338.

#### 385 Author's contributions

386 MLMC designed the study, prepared the sequencing library, analysed the data and wrote the manuscript. MK  
387 contributed to the experimental design and preparation of the sequencing library. KZ performed the sampling  
388 and contributed to the manuscript. YFC contributed to the analysis of the data and the manuscript. JB  
389 designed the study, analysed the data and wrote the manuscript.

390 **Acknowledgements**

391 The authors wish to thank Jeremy Herman (National Museums Scotland) and Johan Michaux (Université de  
392 Liège) for providing the European samples for testing our catalog of SNPs.

393 **Author details**

394 <sup>1</sup>School of Applied Sciences, University of Huddersfield, Quennsgate, Huddersfield, UK. <sup>2</sup>AVIAN Behavioural  
395 Genomics and Physiology Group, IFM Biology, Department of Zoology, Linköping University, Linköping,  
396 Sweden. <sup>3</sup>Friedrich Miescher Laboratory of the Max Planck Society, Tübingen, Germany. <sup>4</sup>The Mammal  
397 Research Institute, Polish Academy of Sciences, Białowieża, Poland.

398 **References**

- 399 1. David H Alexander and Kenneth Lange. Enhancements to the admixture algorithm for individual ancestry  
400 estimation. *BMC bioinformatics*, 12(1):246, 2011.
- 401 2. David H Alexander, John Novembre, and Kenneth Lange. Fast model-based estimation of ancestry in  
402 unrelated individuals. *Genome research*, 19(9):1655–1664, 2009.
- 403 3. S Elizabeth Alter, Jason Munshi-South, and Melanie LJ Stiassny. Genome wide snp data reveal cryptic  
404 phylogeographic structure and microallopatric divergence in a rapids-adapted clade of cichlids from the  
405 congo river. *Molecular ecology*, 26(5):1401–1419, 2017.
- 406 4. Kimberly R Andrews, Jeffrey M Good, Michael R Miller, Gordon Luikart, and Paul A Hohenlohe.  
407 Harnessing the power of radseq for ecological and evolutionary genomics. *Nature Reviews Genetics*, 17(2):  
408 81, 2016.
- 409 5. N.A. Baird, P.D. Etter, T.S. Atwood, M.C. Currey, A.L. Shiver, Z.A. Lewis, E.U. Selker, W.A. Cresko, and  
410 E.A. Johnson. Rapid snp discovery and genetic mapping using sequenced rad markers. *PLoS one*, 3(10):  
411 e3376, 2008.
- 412 6. Simon W Baxter, John W Davey, J Spencer Johnston, Anthony M Shelton, David G Heckel, Chris D  
413 Jiggins, and Mark L Blaxter. Linkage mapping and comparative genomics using next-generation rad  
414 sequencing of a non-model organism. *PLoS one*, 6(4):e19315, 2011.
- 415 7. L Blanco-Bercial and A Bucklin. New view of population genetics of zooplankton: Rad-seq analysis reveals  
416 population structure of the north atlantic planktonic copepod *centropages typicus*. *Molecular ecology*, 25  
417 (7):1566–1580, 2016.
- 418 8. Roy J Britten. Divergence between samples of chimpanzee and human dna sequences is 5%, counting  
419 indels. *Proceedings of the National Academy of Sciences*, 99(21):13633–13635, 2002.
- 420 9. Vanja Bugarski-Stanojević, Jelena Blagojević, Tanja Adnadjević, Vladimir Jovanović, and Mladen  
421 Vujošević. Identification of the sibling species *apodemus sylvaticus* and *apodemus flavicollis* (rodentia,  
422 muridae)—comparison of molecular methods. *Zoologischer Anzeiger-A Journal of Comparative Zoology*,  
423 252(4):579–587, 2013.
- 424 10. Julian M Catchen, Angel Amores, Paul Hohenlohe, William Cresko, and John H Postlethwait. Stacks:  
425 building and genotyping loci de novo from short-read sequences. *G3: Genes, genomes, genetics*, 1(3):  
426 171–182, 2011.
- 427 11. Christopher C Chang, Carson C Chow, Laurent CAM Tellier, Shashaank Vattikuti, Shaun M Purcell, and  
428 James J Lee. Second-generation plink: rising to the challenge of larger and richer datasets. *Gigascience*, 4  
429 (1):7, 2015.
- 430 12. Gareth A Cromie, Katie E Hyma, Catherine L Ludlow, Cecilia Garmendia-Torres, Teresa L Gilbert, Patrick  
431 May, Angela A Huang, Aimée M Dudley, and Justin C Fay. Genomic sequence diversity and population  
432 structure of *saccharomyces cerevisiae* assessed by rad-seq. *G3: Genes, Genomes, Genetics*, 3(12):  
433 2163–2171, 2013.
- 434 13. Benjamin Cull, Alexander GC Vaux, Lisa J Ottowell, Emma L Gillingham, and Jolyon M Medlock. Tick  
435 infestation of small mammals in an english woodland. *Journal of Vector Ecology*, 42(1):74–83, 2017.
- 436 14. Sylwia D Czarnomska, Magdalena Niedziałkowska, Tomasz Borowik, and Bogumiła Jędrzejewska. Regional  
437 and local patterns of genetic variation and structure in yellow-necked mice—the roles of geographic distance,  
438 population abundance, and winter severity. *Ecology and evolution*, 8:8171–8186, 2018.
- 439 15. Petr Danecek, Adam Auton, Goncalo Abecasis, Cornelis A Albers, Eric Banks, Mark A DePristo, Robert E  
440 Handsaker, Gerton Lunter, Gabor T Marth, Stephen T Sherry, et al. The variant call format and vcftools.  
441 *Bioinformatics*, 27(15):2156–2158, 2011.
- 442 16. Jamshid Darvish, Zeinolabedin Mohammadi, Fatemeh Ghorbani, Ahmad Mahmoudi, and Sylvain Dubey.  
443 Phylogenetic relationships of *apodemus kaup*, 1829 (rodentia: Muridae) species in the eastern  
444 mediterranean inferred from mitochondrial dna, with emphasis on iranian species. *Journal of mammalian  
445 evolution*, 22(4):583–595, 2015.
- 446 17. María E Fernández, Daniel E Goszczynski, Juan P Lirón, Egle E Villegas-Castagnasso, Mónica H Carino,  
447 María V Ripoli, Andrés Rogberg-Muñoz, Diego M Posik, Pilar Peral-García, and Guillermo Giovambattista.  
448 Comparison of the effectiveness of microsatellites and snp panels for genetic identification, traceability and  
449 assessment of parentage in an inbred angus herd. *Genetics and molecular biology*, 36(2):185–191, 2013.
- 450 18. R Fernández, M Schubert, AM Vargas-Velázquez, A Brownlow, GA Vikingsson, U Siebert, LF Jensen,  
451 N Øien, D Wall, E Rogan, et al. A genomewide catalogue of single nucleotide polymorphisms in  
452 white-beaked and atlantic white-sided dolphins. *Molecular ecology resources*, 16(1):266–276, 2016.
- 453 19. Martin C Fischer, Christian Rellstab, Marianne Leuzinger, Marie Roumet, Felix Gugerli, Kentaro K Shimizu,  
454 Rolf Holderegger, and Alex Widmer. Estimating genomic diversity and population differentiation—an  
455 empirical comparison of microsatellite and snp variation in *arabidopsis halleri*. *BMC genomics*, 18(1):69,  
456 2017.
- 457 20. Paolo Franchini, Daniel Monné Parera, Andreas F Kautt, and Axel Meyer. quaddrad: a new  
458 high-multiplexing and pcr duplicate removal ddrad protocol produces novel evolutionary insights in a  
459 nonradiating cichlid lineage. *Molecular Ecology*, 26(10):2783–2795, 2017.



- 460 21. Tomasz Gortat, Alicja Gryczyńska-Sięmiątkowska, Robert Rutkowski, Anna Kozakiewicz, Antoni  
461 Mikoszewski, and Michał Kozakiewicz. Landscape pattern and genetic structure of a yellow-necked mouse  
462 apodemus flavicollis population in north-eastern poland. *Acta Theriologica*, 55(2):109–121, 2010.
- 463 22. Nicholas M Hammerman, Ramon E Rivera-Vicens, Matthew P Galaska, Ernesto Weil, Richard S  
464 Appeldoorn, Monica Alfaro, and Nikolaos V Schizas. Population connectivity of the plating coral agaricia  
465 lamarcki from southwest puerto rico. *Coral Reefs*, 37(1):183–191, 2018.
- 466 23. Lorenz Hauser, Melissa Baird, RAY Hilborn, Lisa W Seeb, and James E Seeb. An empirical comparison of  
467 snps and microsatellites for parentage and kinship assignment in a wild sockeye salmon (*oncorhynchus*  
468 *nerka*) population. *Molecular ecology resources*, 11:150–161, 2011.
- 469 24. Jeremy S Herman, Frída Jóhannesdóttir, Eleanor P Jones, Allan D McDevitt, Johan R Michaux, Thomas A  
470 White, Jan M Wójcik, and Jeremy B Searle. Post-glacial colonization of europe by the wood mouse,  
471 *apodemus sylvaticus*: evidence of a northern refugium and dispersal with humans. *Biological Journal of the*  
472 *Linnean Society*, 120(2):313–332, 2017.
- 473 25. Andrew L Hipp, Deren AR Eaton, Jeannine Cavender-Bares, Elisabeth Fitzek, Rick Nipper, and Paul S  
474 Manos. A framework phylogeny of the american oak clade based on sequenced rad data. *PLoS One*, 9(4):  
475 e93975, 2014.
- 476 26. Paul A Hohenlohe, Mitch D Day, Stephen J Amish, Michael R Miller, Nick Kamps-Hughes, Matthew C  
477 Boyer, Clint C Muhlfeld, Fred W Allendorf, Eric A Johnson, and Gordon Luikart. Genomic patterns of  
478 introgression in rainbow and westslope cutthroat trout illuminated by overlapping paired-end rad  
479 sequencing. *Molecular ecology*, 22(11):3002–3013, 2013.
- 480 27. Joseph Hughes. Sequence-manipulation. *GitHub repository*, 2011.
- 481 28. Jasmine K Janes, Joshua M Miller, Julian R Dupuis, René M Malenfant, Jamieson C Gorrell, Catherine I  
482 Cullingham, and Rose L Andrew. The  $k=2$  conundrum. *Molecular Ecology*, 26(14):3594–3602, 2017.
- 483 29. Daniel L Jeffries, Gordon H Copp, Lori Lawson Handley, K Håkan Olsén, Carl D Sayer, and Bernd Hänfling.  
484 Comparing radseq and microsatellites to infer complex phylogeographic patterns, an empirical perspective  
485 in the crucian carp, *carassius carassius*, l. *Molecular ecology*, 25(13):2997–3018, 2016.
- 486 30. Vida Jojić, Vanja Bugarski-Stanojević, Jelena Blagojević, and Mladen Vujošević. Discrimination of the  
487 sibling species *apodemus flavicollis* and *a. sylvaticus* (rodentia, muridae). *Zoologischer Anzeiger-A Journal*  
488 *of Comparative Zoology*, 253(4):261–269, 2014.
- 489 31. Thibaut Jombart. adegenet: a r package for the multivariate analysis of genetic markers. *Bioinformatics*,  
490 24(11):1403–1405, 2008.
- 491 32. L Lacey Knowles, Rob Massatti, Qixin He, Link E Olson, and Hayley C Lanier. Quantifying the similarity  
492 between genes and geography across alaska's alpine small mammals. *Journal of Biogeography*, 43(7):  
493 1464–1476, 2016.
- 494 33. Marcin Kolodziej, Alicja Melgies, Justyna Joniec-Wiechetek, Aleksander Michalski, Anna Nowakowska,  
495 Grzegorz Pitucha, and Marcin Niemcewicz. First molecular characterization of dobrava-belgrade virus  
496 found in *apodemus flavicollis* in poland. *Annals of Agricultural and Environmental Medicine*, 25(2):  
497 368–373, 2018.
- 498 34. J. Kozłowski, M. Konarzewski, and A.T. Gawelczyk. Cell size as a link between noncoding dna and  
499 metabolic rate scaling. *Proceedings of the National Academy of Sciences*, 100(24):14080–14085, 2003.
- 500 35. Hayley C Lanier, Rob Massatti, Qixin He, Link E Olson, and L Lacey Knowles. Colonization from divergent  
501 ancestors: glaciation signatures on contemporary patterns of genomic variation in collared pikas (*ochotona*  
502 *collaris*). *Molecular Ecology*, 24(14):3688–3705, 2015.
- 503 36. A.G. Lapinski, M.V. Pavlenko, L.L. Solovenchuk, and V.V. Gorbachev. Some limitations in the use of the  
504 mitochondrial dna cytb gene as a molecular marker for phylogenetic and population-genetic studies by the  
505 example of the *apodemus* genus. *Russian Journal of Genetics: Applied Research*, 6(1):84–90, 2016.
- 506 37. Tae-Ho Lee, Hui Guo, Xiyin Wang, Changsoo Kim, and Andrew H Paterson. SnpPhylo: a pipeline to  
507 construct a phylogenetic tree from huge snp data. *BMC genomics*, 15(1):162, 2014.
- 508 38. Wen-Hsiung Li, Masako Tanimura, and Paul M Sharp. An evaluation of the molecular clock hypothesis  
509 using mammalian dna sequences. *Journal of molecular evolution*, 25(4):330–342, 1987.
- 510 39. S. Maciak, E. Bonda-Ostaszewska, M. Czarnofęski, M. Konarzewski, and J. Kozłowski. Mice divergently  
511 selected for high and low basal metabolic rates evolved different cell size and organ mass. *Journal of*  
512 *evolutionary biology*, 27(3):478–487, 2014.
- 513 40. M. Martiniaková, R. Omelka, J. Jancová, R. Stawarz, and G. Formicki. Heavy metal content in the femora  
514 of yellow-necked mouse (*apodemus flavicollis*) and wood mouse (*apodemus sylvaticus*) from different types  
515 of polluted environment in slovakia. *Environmental monitoring and assessment*, 171(1-4):651–660, 2010.
- 516 41. A Mastretta-Yanes, Nils Arrigo, Nadir Alvarez, Tove H Jorgensen, D Piñero, and BC Emerson. Restriction  
517 site-associated dna sequencing, genotyping error estimation and de novo assembly optimization for  
518 population genetic inference. *Molecular Ecology Resources*, 15(1):28–41, 2015.
- 519 42. Johan René Michaux, Elodie Magnanou, Emmanuel Paradis, Caroline Nieberding, and Roland Libois.  
520 Mitochondrial phylogeography of the woodmouse (*apodemus sylvaticus*) in the western palearctic region.  
521 *Molecular Ecology*, 12(3):685–697, 2003.
- 522 43. JR Michaux, P Chevret, M-G Filippucci, and M Macholan. Phylogeny of the genus *apodemus* with a  
523 special emphasis on the subgenus *sylvaemus* using the nuclear irbp gene and two mitochondrial markers:  
524 cytochrome b and 12s rRNA. *Molecular phylogenetics and evolution*, 23(2):123–136, 2002.
- 525 44. JR Michaux, Roland Libois, E Paradis, and M-G Filippucci. Phylogeographic history of the yellow-necked  
526 fieldmouse (*apodemus flavicollis*) in europe and in the near and middle east. *Molecular phylogenetics and*  
527 *evolution*, 32(3):788–798, 2004.
- 528 45. JR Michaux, Roland Libois, and MG Filippucci. So close and so different: comparative phylogeography of  
529 two small mammal species, the yellow-necked fieldmouse (*apodemus flavicollis*) and the woodmouse  
530 (*apodemus sylvaticus*) in the western palearctic region. *Heredity*, 94(1):52–63, 2005.

- 531 46. M.R. Miller, J.P. Dunham, A. Amores, W.A. Cresko, and E.A. Johnson. Rapid and cost-effective  
532 polymorphism identification and genotyping using restriction site associated dna (rad) markers. *Genome*  
533 *research*, 17(2):240–248, 2007.
- 534 47. Luwanika Mlera and Marshall E Bloom. The role of mammalian reservoir hosts in tick-borne flavivirus  
535 biology. *Frontiers in cellular and infection microbiology*, 8:298, 2018.
- 536 48. Andre E Moura, John G Kenny, Roy Chaudhuri, Margaret A Hughes, Andreanna J. Welch, Ryan R  
537 Reisinger, PJ Nico de Bruyn, Marilyn E Dahlheim, Neil Hall, and A Rus Hoelzel. Population genomics of  
538 the killer whale indicates ecotype evolution in sympatry involving both selection and drift. *Molecular*  
539 *Ecology*, 23(21):5179–5192, 2014.
- 540 49. Eric Pante, Jawad Abdelkrim, Amélia Viricel, Delphine Gey, SC France, Marie-Catherine Boisselier, and  
541 Sarah Samadi. Use of rad sequencing for delimiting species. *Heredity*, 114(5):450, 2015.
- 542 50. Anna Papa, Elton Rogozi, Enkelejda Velo, Evangelia Papadimitriou, and Silvia Bino. Genetic detection of  
543 hantaviruses in rodents, albania. *Journal of medical virology*, 88(8):1309–1313, 2016.
- 544 51. Josephine R Paris, Jamie R Stevens, and Julian M Catchen. Lost in parameter space: a road map for  
545 stacks. *Methods in Ecology and Evolution*, 2017.
- 546 52. Venkatramana Pegadaraju, Rick Nipper, Brent Hulke, Lili Qi, and Quentin Schultz. De novo sequencing of  
547 sunflower genome for snp discovery using rad (restriction site associated dna) approach. *BMC genomics*,  
548 14(1):556, 2013.
- 549 53. Brant K Peterson, Jesse N Weber, Emily H Kay, Heidi S Fisher, and Hopi E Hoekstra. Double digest  
550 radseq: an inexpensive method for de novo snp discovery and genotyping in model and non-model species.  
551 *PLoS one*, 7(5):e37135, 2012.
- 552 54. Jesse A Poland and Trevor W Rife. Genotyping-by-sequencing for plant breeding and genetics. *The Plant*  
553 *Genome*, 5(3):92–102, 2012.
- 554 55. Jesse A Poland, Patrick J Brown, Mark E Sorrells, and Jean-Luc Jannink. Development of high-density  
555 genetic maps for barley and wheat using a novel two-enzyme genotyping-by-sequencing approach. *PLoS*  
556 *one*, 7(2):e32253, 2012.
- 557 56. Zdzisław Pucek, Włodzimierz Jędrzejewski, Bogumiła Jędrzejewska, and Michalina Pucek. Rodent  
558 population dynamics in a primeval deciduous forest (białowieża national park) in relation to weather, seed  
559 crop, and predation. *Acta Theriologica*, 38(2):199–232, 1993.
- 560 57. Sebastien J Puechmaile. The program structure does not reliably recover the correct population structure  
561 when sampling is uneven: subsampling and new estimators alleviate the problem. *Molecular Ecology*  
562 *Resources*, 16(3):608–627, 2016.
- 563 58. S Purcell and CC Chang. Plink 1.9 package. 2018. URL <https://www.cog-genomics.org/plink/1.9/>.
- 564 59. Marija Rajičić, Svetlana A Romanenko, Tatyana V Karamysheva, Jelena Blagojević, Tanja Adnađević,  
565 Ivana Budinski, Aleksey S Bogdanov, Vladimir A Trifonov, Nikolay B Rubtsov, and Mladen Vujošević. The  
566 origin of b chromosomes in yellow-necked mice (*apodemus flavicollis*)—break rules but keep playing the  
567 game. *PLoS one*, 12(3):e0172704, 2017.
- 568 60. AM Reitzel, S Herrera, MJ Layden, MQ Martindale, and TM Shank. Going where traditional markers have  
569 not gone before: utility of and promise for rad sequencing in marine invertebrate phylogeography and  
570 population genomics. *Molecular ecology*, 22(11):2953–2970, 2013.
- 571 61. Dania Richter, Daniela B Schlee, and Franz-Rainer Matuschka. Reservoir competence of various rodents  
572 for the lyme disease spirochete *borrelia spielmanii*. *Applied and environmental microbiology*, 2011.
- 573 62. Adriana Rico, Pavel Kindlmann, and František Sedláček. Can the barrier effect of highways cause genetic  
574 subdivision in small mammals? *Acta theriologica*, 54(4):297–310, 2009.
- 575 63. Naiara Rodriguez-Ezpeleta, Paula Álvarez, and Xabier Irigoien. Genetic diversity and connectivity in  
576 *maurolicus muelleri* in the bay of biscay inferred from thousands of snp markers. *Frontiers in genetics*, 8:  
577 195, 2017.
- 578 64. Aaron Shafer, Claire R Peart, Sergio Tusso, Inbar Maayan, Alan Brelsford, Christopher W Wheat, and  
579 Jochen BW Wolf. Bioinformatic processing of rad-seq data dramatically impacts downstream population  
580 genetic inference. *Methods in Ecology and Evolution*, 8(8):907–917, 2017.
- 581 65. Allison J Shultz, Allan J Baker, Geoffrey E Hill, Paul M Nolan, and Scott V Edwards. Snp s across time  
582 and space: population genomic signatures of founder events and epizootics in the house finch (*haemorrhous*  
583 *mexicanus*). *Ecology and evolution*, 6(20):7475–7489, 2016.
- 584 66. M. Velickovic. Measures of the developmental stability, body size and body condition in the black-striped  
585 mouse (*apodemus agrarius*) as indicators of a disturbed environment in northern serbia. *Belgian Journal of*  
586 *Zoology*, 137(2):147, 2007.

587 **Additional Files**

588 Additional file 1 — Supplementary Materials
